# Supplementary material for: Characterization of an Integrated Active Glu-1Ay Allele in Common Wheat from Wild Emmer and Its Potential Role in Flour Improvement
Source: MDPI journal article supplement (doi:10.3390/ijms19040923), 2018-03-21
Supplement: s1 [file s1]

|          |                                                                                                                             |     |
|----------|-----------------------------------------------------------------------------------------------------------------------------|-----|
| KC545952 | ATGGCTAAGCGGTTGGTCTCTTTGCGACAGTAGTCATTGGCCTCGTGTCTCTCGCCGTCGCTGAAGGTGAGACCTCTAAGCAACTACAGTGCGAGCGCGAGCTCCAGGAGAGTTTCGCTTGAG | 123 |
| KC545956 | -----A-----G-----                                                                                                           | 123 |
| FJ519636 | -----A-----A-----                                                                                                           | 123 |
| FJ404595 | -----G-----A-----G-----G-----A--C-----                                                                                      | 123 |
| EU984503 | -----G-----A-----G-----G-----A--C-----                                                                                      | 123 |
| AM183223 | -----G-----A-----G-----G-----A--C-----                                                                                      | 123 |
| AY245578 | -----C-----G-----A-----G-----G-----A--C-----                                                                                | 123 |
| JQ318694 | -----G-----A-----G-----G-----A--C-----                                                                                      | 123 |
| EU984504 | -----A-----G-----A-----G-----G-----A--C-----                                                                                | 123 |
| EU984507 | -----C-----G-----A-----G-----G-----A--C-----                                                                                | 123 |
| EU984511 | -----G-----A-----G-----G-----A--C-----                                                                                      | 123 |
| AJ306977 | -----G-----A-----G-----G-----A--C-----                                                                                      | 123 |
| EU984506 | -----C-----G-----A-----G-----G-----A--C-----                                                                                | 123 |
| JQ318695 | -----C-----G-----A-----G-----G-----A--C-----                                                                                | 123 |

|          |                                                                                                                             |     |
|----------|-----------------------------------------------------------------------------------------------------------------------------|-----|
| KC545952 | GCGATGCCGGCTGGTTCGTGGACCAACAGTTGGCCGGCCGGCTGCCATGGAGCACGGGGCTCCAGATGCGGTGCTGCCAGCAGCTCCGAGATATTAGTGCCAAGTGTGCCCCGTCGCCACAGC | 246 |
| KC545956 | -----A-----                                                                                                                 | 246 |
| FJ519636 | -----T-----                                                                                                                 | 246 |
| FJ404595 | -----GT-----                                                                                                                | 246 |
| EU984503 | -----A--GT-----                                                                                                             | 246 |
| AM183223 | -----GT-----                                                                                                                | 246 |
| AY245578 | -----GT-----                                                                                                                | 246 |
| JQ318694 | -----GT-----                                                                                                                | 246 |
| EU984504 | -----GT-----                                                                                                                | 246 |
| EU984507 | -----GT-----                                                                                                                | 246 |
| EU984511 | -----GT-----                                                                                                                | 246 |
| AJ306977 | -----GT-----                                                                                                                | 246 |
| EU984506 | -----A-----T-----GT-----                                                                                                    | 246 |
| JQ318695 | -----T-----GT-----                                                                                                          | 246 |

|          |                                                                                                                             |     |
|----------|-----------------------------------------------------------------------------------------------------------------------------|-----|
| KC545952 | CAAGTCGCAAGACAACATGGGCAAACCGCGGTGCCGCCCAAGGGCGGATCCTTCTACCATCGCGAGACCACGCCACTGCAGCAACTCCAACAAGGAATATTTGGGGGAACATCTTCACAAACA | 369 |
| KC545956 | -----C-----                                                                                                                 | 369 |
| FJ519636 | -----T-----                                                                                                                 | 369 |
| FJ404595 | -----T-----TC-----A-----                                                                                                    | 369 |
| EU984503 | -----T-----TC-----A-----                                                                                                    | 369 |
| AM183223 | -----T-----TC-----A-----                                                                                                    | 369 |
| AY245578 | -----T-----TC-----A-----                                                                                                    | 369 |
| JQ318694 | -----T-----TC-----A-----                                                                                                    | 369 |
| EU984504 | -----T-----C-----                                                                                                           | 369 |
| EU984507 | -----T-----C-----                                                                                                           | 369 |
| EU984511 | -----T-----C-----                                                                                                           | 369 |
| AJ306977 | -----T-----C-----                                                                                                           | 369 |
| EU984506 | -----T-----C--T-----                                                                                                        | 369 |
| JQ318695 | -----T-----C--T-----                                                                                                        | 369 |

|          |                                                                                                                               |     |
|----------|-------------------------------------------------------------------------------------------------------------------------------|-----|
| KC545952 | GTACAAGGGTATTACCCAAGTGTAAATATCTCCTCAGCAGGGGTCATATTATCCAGGCCAAGCTTCTCTACAACAGCCAGGAAAAATGGCAAGAACTAGGACAAGGGCAACAATGGTACTATCCA | 492 |
| KC545956 | -----C-----                                                                                                                   | 492 |
| FJ519636 | -----C-----                                                                                                                   | 492 |
| FJ404595 | -----C-----A-----G-----                                                                                                       | 492 |
| EU984503 | -----C-----G-----                                                                                                             | 492 |
| AM183223 | -----C-----A-----G-----                                                                                                       | 492 |
| AY245578 | -----C-----G-----                                                                                                             | 492 |
| JQ318694 | -----C-----G-----                                                                                                             | 492 |
| EU984504 | -----C-----G-----                                                                                                             | 492 |
| EU984507 | -----C-----G-----                                                                                                             | 492 |
| EU984511 | -----C-----G-----G-----G-----                                                                                                 | 492 |
| AJ306977 | -----C-----A-----G-----                                                                                                       | 492 |
| EU984506 | -----C-----C-----C-----C-----G-----                                                                                           | 492 |
| JQ318695 | -----C-----C-----C-----C-----G-----                                                                                           | 492 |

|          |                                                                                                                             |     |
|----------|-----------------------------------------------------------------------------------------------------------------------------|-----|
| KC545952 | ACTTCTCTGCAGAAGCCAGGACAAGGGCAACAAGGGTACTACCGAACTTCTCTGCAGCAGCCAGGACAAAGGCAACAAGGGTACTACCGAACTTCTCTGCAGCAGCCAGGACAAGGGCAACAG | 615 |
| KC545956 | -----C-----                                                                                                                 | 615 |
| FJ519636 | -----A-----                                                                                                                 | 615 |
| FJ404595 | -----C-----A-----G-----                                                                                                     | 615 |
| EU984503 | -----C-----A-----G-----                                                                                                     | 615 |
| AM183223 | -----C-----A-----G-----                                                                                                     | 615 |
| AY245578 | -----C-----A-----G-----                                                                                                     | 615 |
| JQ318694 | -----C-----A-----G-----                                                                                                     | 615 |
| EU984504 | -----C-----.....G-----                                                                                                      | 570 |
| EU984507 | -----C-----.....G-----                                                                                                      | 570 |
| EU984511 | -----C-----.....G-----                                                                                                      | 570 |
| AJ306977 | -----C-----.....G-----                                                                                                      | 570 |
| EU984506 | -----C-----G.....A-----G-----C-----                                                                                         | 588 |
| JQ318695 | -----C-----G.....A-----G-----C-----                                                                                         | 588 |

|          |                                                                                                                              |     |
|----------|------------------------------------------------------------------------------------------------------------------------------|-----|
| KC545952 | ATAGGACAATGGCAACAAGGGTACTACCCAACCTCTCCGCAGCACCCAGGACAAGGGCAACAACCAGGACAAGTGCAAAAAATAGGACAAGGGCAACAACCAGAAAAAGGGCAACAACCTAGGG | 738 |
| KC545956 | -----T-----A                                                                                                                 | 738 |
| FJ519636 | -----T-----A                                                                                                                 | 738 |
| FJ404595 | -----T-----A                                                                                                                 | 738 |
| EU984503 | -----T-----A                                                                                                                 | 738 |
| AM183223 | -----T-----A                                                                                                                 | 738 |
| AY245578 | -----T-----A                                                                                                                 | 738 |
| JQ318694 | -----T-----A                                                                                                                 | 738 |
| EU984504 | -----T-----A                                                                                                                 | 693 |
| EU984507 | -----T-----A                                                                                                                 | 693 |
| EU984511 | -----T-----A                                                                                                                 | 693 |
| AJ306977 | -----T-----T-----T-----A                                                                                                     | 693 |
| EU984506 | -----T-----C-----C-----G-----C-----A                                                                                         | 711 |
| JQ318695 | -----T-----C-----C-----G-----C-----A                                                                                         | 711 |

|          |                                                                                |                             |     |
|----------|--------------------------------------------------------------------------------|-----------------------------|-----|
| KC545952 | CAAGAGCAACAAATAGGACAAGGGCAACAACCAGAACAAGGGCAACAACCAGGACAAGGGCAACAAGGGTACTACCCA | ACTTCTCTGCAGCAGCCAGGACAAGGG | 861 |
| KC545956 | -----                                                                          | G-----                      | 861 |
| FJ519636 | -----                                                                          | A-----                      | 861 |
| FJ404595 | -----                                                                          | A-----C-----A-----          | 861 |
| EU984503 | -----                                                                          | A-----C-----A-----          | 861 |
| AM183223 | -----G-----                                                                    | A-----C-----A-----          | 861 |
| AY245578 | -----                                                                          | A-----C-----A-----          | 861 |
| JQ318694 | -----                                                                          | A-----C-----A-----          | 843 |
| EU984504 | -----G-----                                                                    | A-----A-----                | 798 |
| EU984507 | -----G-----G-----                                                              | A-C-----A-----              | 798 |
| EU984511 | -----G-----                                                                    | A-----N-----A-----          | 798 |
| AJ306977 | -----                                                                          | A-----T-A-----              | 798 |
| EU984506 | ---G---AT---G---A---A---                                                       | T-A-----C-----T-T-----      | 834 |
| JQ318695 | ---G---AT---G---A---                                                           | T-A-----C-----T-T-----      | 834 |

|          |                                                                                    |                                           |     |
|----------|------------------------------------------------------------------------------------|-------------------------------------------|-----|
| KC545952 | CAACAACCAGGACAATGGCAACAACCAGTACAAG                                                 | .....G.....                               | 896 |
| KC545956 | -----                                                                              | -.....                                    | 896 |
| FJ519636 | -----                                                                              | -.....                                    | 896 |
| FJ404595 | -----G-----                                                                        | -.....                                    | 896 |
| EU984503 | -----G-----                                                                        | -.....                                    | 896 |
| AM183223 | -----G-----                                                                        | -.....                                    | 896 |
| AY245578 | -----G-----                                                                        | -.....                                    | 896 |
| JQ318694 | -----G-----                                                                        | -.....                                    | 878 |
| EU984504 | -----G-----                                                                        | -.....                                    | 833 |
| EU984507 | -----G-----                                                                        | -.....                                    | 833 |
| EU984511 | -----G-----                                                                        | -.....                                    | 833 |
| AJ306977 | -----G-----G-----                                                                  | -.....                                    | 833 |
| EU984506 | -----T-G---TGGCAACAACCAGGACAA                                                      | .....TGGCAACAACCAGGACAAGGGCAACAACCAGGACAA | 921 |
| JQ318695 | -----T-G---GGCAACAACCAGGACAAGGGCAACAACCAGGACAATGGCAACAACCAAGACAAGGGCAACAACCAGGACAA |                                           | 957 |

|            |                                                                                                                             |      |
|------------|-----------------------------------------------------------------------------------------------------------------------------|------|
| KC545952   | ..GCAACAAGGGTACTACTCAACTTCTCTGCAGCAGCCAGTACAAGGGCAACAAGGGCACTACCTAGCTTCTCAGCACCAGCCAGGGCAGGGGCAACAAGGGCACCACCCAGCTTCTCTGCAG | 1017 |
| KC545956   | -----                                                                                                                       | 1017 |
| FJ519636   | -----                                                                                                                       | 1017 |
| FJ404595   | ..-----C-----G-----C-----                                                                                                   | 1017 |
| EU984503   | ..---A-----C-----G-----C-----                                                                                               | 1017 |
| AM183223   | ..-----C-----G-----C-----                                                                                                   | 1017 |
| AY245578   | ..---A-----C-----G-----C-----                                                                                               | 1017 |
| JQ318694   | ..---A-----C-----G-----C-----                                                                                               | 999  |
| EU984504   | ..-----C-----G-----C-----                                                                                                   | 954  |
| EU984507   | ..-----C-----G-----C-----                                                                                                   | 954  |
| EU984511   | ..-----C-----A-----G-----C-----                                                                                             | 954  |
| AJ306977   | ..-----A-----C-----T---G-----C-----                                                                                         | 954  |
| EU984506GG | -----C-----G---G-----C-----A-----A-----                                                                                     | 1044 |
| JQ318695GG | -----C-----G-----C-----A-----A-----                                                                                         | 1080 |

KC545952CAGTCAGGACAAGGGCAACAAGGGCACCACCCAGCTTCTCTACAGCAGCCAGGACAAGGGAAACAACAGGACAGCGAGAACAAGGCAACAACCAGGACAAGGGCAACAACAGGACAAGAG1140  
KC545956-----G-----1140  
FJ519636-----A-----1140  
FJ404595-----G-----A-A-----G-1140  
EU984503-----G-----A-A-----G-1140  
AM183223-----G-----A-A-----G-1140  
AY245578-----G-----A-A-----G-1140  
JQ318694-----G-----A-A-----G-1122  
EU984504-----A-----T-----G-----A-----G-1077  
EU984507-----A-----T-----G-----A-----G-1077  
EU984511-----A-----T-C-----G-----A-----G-1077  
AJ306977-----G-----A-----G-1077  
EU984506-----G-A-----A-----G--G-1167  
JQ318695-----G-A-----A-----G--G-1203

KC545952CAACAGCCAGAACAAGAGCAACAAGTAGGACAGGGGCAACAAGGGTACTATCCAACCTTATCTGCAACAGCCAGGACAAGGGCAACAGCCAGAACAATGGCAACAACCAGGACAAGGTCAACAA1263  
KC545956-----A-----G-----1263  
FJ519636-----A-----A-----1263  
FJ404595---A-----C-----A-----TC-----A-----1263  
EU984503---A-----C-----A-----C-----A-----G1263  
AM183223---A-----C-----A-----TC-----A-----1263  
AY245578---A-----C-----A--G-----C-----A-----G1263  
JQ318694---A-----C-----A-----C-----A-----G1245  
EU984504---A-----C-----A-----A-----T-----1200  
EU984507---A-----C-----A-----A-----T-----1200  
EU984511---A-----C-----A-----A-----T-----1200  
AJ306977---A-----C-----A-----A-----1200  
EU984506---A-----C-----A-----C-C-----A-----G-----1290  
JQ318695---A-----C-----A-----C-C-----A-----G-----1326

KC545952GGGCACTACCCAGCTTCTCTGCAGCAGTCAGGACAAGGACAACAAGGGCACTACCCAGCTTCTCTGCAGCAGCTAGGACAAGGACAACCAGGACAAACGCAACAACCAGGACAAGG.....1379  
KC545956-----1379  
FJ519636-----1379  
FJ404595A-----A-----A-----A-----1379  
EU984503A-----A-----C-----A-----1379  
AM183223A-----A-----A-----C-----A-----1379  
AY245578A-----A-----C-----A-----1379  
JQ318694A-----A-----C-----A-----1361  
EU984504-----C-----C-----A-----1316  
EU984507-----C-----A-----1316  
EU984511-----C-----C-----A-----1316  
AJ306977-----C-----C-----T-----1316  
EU984506-----C-----C-----G-----ACAACCA1413  
JQ318695-----C-----C-----G-----ACAACCA1449

KC545952.....GCAACAGCCAGAACAAGA.....GGAACAATCAGGACAAGGGCAACAAGGGTACTATCCAAC TTCTCCGCAGCAACCAGGACAAGGGCAACAACCAGGACAAGGG1479  
KC545956.....-----A--1479  
FJ519636.....-----G--1479  
FJ404595.....-T-----C-----A-----G--1479  
EU984503.....-T-----C-----A-----G--1479  
AM183223.....-T-----C-----A-----G--1479  
AY245578.....-T-----C-----C-----A-----G--1479  
JQ318694.....-T-----C-----A-----G--1461  
EU984504.....-T-----C-----C---C---A-----G--1416  
EU984507.....-T-----C-----C---C---A-----G-----G--1416  
EU984511.....-T-----C-----C---C---A-----G--1416  
AJ306977.....-----C---C-----G--1416  
EU984506GGACAAAC-----A---G---GACAACCAGGAGAAAAC-C-----C---C-----A---G-----G--1536  
JQ318695GGACAAAC-----A---G---GACAACCAGGAGAAAAC-C-----C---C-----A---G-----G--1572

KC545952CAACAAGGGCACTTCCCAACTTCT.....GGACAAGCGCAACAACCAGGACAAGGCCAACAAATAGGACAAGCGCAACAAC TAGGACAAGGGCAACAAGGATACTACCCAAC TTCT1590  
KC545956-----1590  
FJ519636-----1590  
FJ404595-----1590  
EU984503-----G-----C1590  
AM183223-----1590  
AY245578-----T-----A-----1590  
JQ318694-----1572  
EU984504-----1527  
EU984507-----1527  
EU984511-----1527  
AJ306977-----T-----1527  
EU984506-----T---G-----CCGCAGCAGCCA-----C---T-----1659  
JQ318695-----T---G-----CCGCAGCAGCCA-----C---T-----1695

KC545952CCGCAGCAGCCAGGACAGGAGCAACAGTCAAGACAAGGGCAACAGTTAGGACAAGGACACCAACCAGGACAAGGGCAACAATCAGGACAAGAGCAACAAGGCTACGACAGCCCATACCATGTT1713  
KC545956-----A-----1713  
FJ519636-----A-----1713  
FJ404595-T---A-----A-----G-----1713  
EU984503-T---A-----A-----G-----1713  
AM183223-T---A-----A-----G-----1713  
AY245578-T-----A-----G-----1713  
JQ318694-T-----A-----G-----1695  
EU984504-T-----A-----G-----1650  
EU984507-T-----GA-----G-----1650  
EU984511-T-----A-----G-----1650  
AJ306977-T-----A-----A-----G-----T-----A-----1650  
EU984506-T-----A---G---G-----A-----T---A-----1782  
JQ318695-T-----A-----G-----A-----T---A-----1818

KC545952AGCGTGGAGCAGCAAGCGGCCAGCCCAAAGGTGGCAAAGGCGCACCATCCGGTGGCACAGCTGCCGACAATGTGCCAGATGGAGGGGGGCGACGCATTGTCGGCTAGCCAGTGATAG1830  
KC545956-----G-----C-----1830  
FJ519636-----A-----C-----1830  
FJ404595-----A-----C-----1830  
EU984503-----A-----1830  
AM183223-----A--A-----1830  
AY245578-----A-----T-----C-----1830  
JQ318694-----A-----C-----1812  
EU984504-----A-----1767  
EU984507-----A-----C-----1767  
EU984511-----A-----C-----1767  
AJ306977-----A-----C-----T-----1767  
EU984506-----T--T-----A-----T-AC-----G-----C-----1899  
JQ318695-----T-----A-----G-----AC-----C-----1935

**Figure S1: Multiple alignment of the full-length sequences of cloned KC545952 (TaAy7-40), KC545956 (D97) , with 12 published active *IAy* alleles.**  
Dash line indicates the identical sequences in the *IAy* alleles. The capital letters indicate the nucleotide polymorphisms detected in the *IAy* sequences.
