# Supplementary material for: Characterization of an Integrated Active Glu-1Ay Allele in Common Wheat from Wild Emmer and Its Potential Role in Flour Improvement
Source: MDPI journal article supplement (doi:10.3390/ijms19040923), 2018-03-21
Supplement: s1 [file s1]

**Table S1.** Identities of sequences between the KC545952 and 44 other HMW-GS genes from *Triticum* species.

| HMW-GS alleles   | GenBank accession | Species                                            | Genome | The size of ORF (bp) | Identity(%) |          |          |
|------------------|-------------------|----------------------------------------------------|--------|----------------------|-------------|----------|----------|
|                  |                   |                                                    |        |                      | KC545952    | KC545956 | KC545955 |
| 1Ay active genes | KC545952          | <i>T. aestivum</i> ssp. <i>aestivum</i> (TaAy7-40) | AABBDD | 1830                 |             | 99.2     | 96.2     |
|                  | KC545956          | <i>T. turgidum</i> ssp. <i>dicoccoides</i> (D97)   | AABB   | 1830                 | 99.2        |          | 96.2     |
|                  | JF519636          | <i>T. turgidum</i> ssp. <i>dicoccoides</i>         | AABB   | 1830                 | 99.5        | 99.5     | 96.6     |
|                  | FJ404595          | <i>T. urartu</i>                                   | AA     | 1830                 | 97.6        | 97.6     | 95.7     |
|                  | EU984503          | <i>T. urartu</i>                                   | AA     | 1830                 | 97.5        | 97.4     | 95.6     |
|                  | AM183223          | <i>T. urartu</i>                                   | AA     | 1830                 | 97.3        | 97.2     | 95.5     |
|                  | AY245578          | <i>T. urartu</i>                                   | AA     | 1830                 | 97.3        | 97.3     | 95.4     |
|                  | JQ318694          | <i>T. monococcum</i> ssp. <i>monococcum</i>        | AA     | 1812                 | 96.7        | 96.7     | 96.6     |
|                  | EU984504          | <i>T. urartu</i>                                   | AA     | 1767                 | 94.5        | 94.4     | 94.5     |
|                  | EU984507          | <i>T. monococcum</i> ssp. <i>aegilopoides</i>      | AA     | 1767                 | 94.2        | 94.3     | 94.3     |
|                  | EU984511          | <i>T. turgidum</i> ssp. <i>dicoccum</i>            | AABB   | 1767                 | 94.2        | 94.3     | 94.3     |
|                  | AJ306977          | <i>T. timopheevii</i> ssp. <i>timopheevii</i>      | AAGG   | 1767                 | 93.8        | 93.8     | 93.9     |
|                  | JQ318695          | <i>T. monococcum</i> ssp. <i>monococcum</i>        | AA     | 1935                 | 85.2        | 85.3     | 78.2     |
|                  | EU984506          | <i>T. monococcum</i> ssp. <i>aegilopoides</i>      | AA     | 1899                 | 86.4        | 86.5     | 84.4     |
| 1Ay pseudogenes  | JQ007586          | <i>T. turgidum</i> ssp. <i>dicoccum</i>            | AABB   | 1830                 | 97.9        | 98.0     | 95.9     |
|                  | JQ007590          | <i>T. turgidum</i> ssp. <i>dicoccum</i>            | AABB   | 1830                 | 97.9        | 98.0     | 95.9     |
|                  | AY260548          | <i>T. turgidum</i> ssp. <i>dicoccum</i>            | AABB   | 1830                 | 97.7        | 92.0     | 95.7     |
|                  | EU984510          | <i>T. turgidum</i> ssp. <i>dicoccum</i>            | AABB   | 1830                 | 97.5        | 97.5     | 95.5     |
|                  | AY722710          | <i>T. turgidum</i> ssp. <i>polonicum</i>           | AABB   | 1812                 | 97.5        | 97.6     | 98.3     |
|                  | AY303766          | <i>T. aestivum</i> ssp. <i>spelta</i>              | AABBDD | 1830                 | 97.5        | 97.4     | 95.5     |
|                  | DQ537335          | <i>T. aestivum</i> ssp. <i>aestivum</i>            | AABBDD | 1812                 | 97.7        | 97.65    | 98.5     |
|                  | X03042            | <i>T. aestivum</i> ssp. <i>aestivum</i>            | AABBDD | 1812                 | 97.7        | 97.7     | 98.5     |
|                  | HQ846968          | <i>T. aestivum</i> ssp. <i>aestivum</i>            | AABBDD | 1803                 | 96.8        | 96.8     | 97.6     |
|                  | AY260549          | <i>T. turgidum</i> ssp. <i>dicoccum</i>            | AABB   | 1830                 | 97.2        | 97.1     | 95.2     |
|                  | HM131807          | <i>T. timopheevii</i> ssp. <i>araraticum</i>       | AAGG   | 1866                 | 96.9        | 96.9     | 94.5     |
|                  | JQ689003          | <i>T. turgidum</i> ssp. <i>durum</i>               | AABB   | 1830                 | 97.5        | 97.4     | 95.5     |
|                  | KC545955          | <i>T. aestivum</i> ssp. <i>aestivum</i> (CN16)     | AABBDD | 1791                 | 96.2        | 96.2     |          |
|                  | AY245579          | <i>T. urartu</i>                                   | AA     | 1920                 | 92.0        | 92.0     | 90.1     |
|                  | EU984505          | <i>T. urartu</i>                                   | AA     | 1920                 | 92.8        | 92.7     | 90.9     |
|                  | GQ184456          | <i>T. monococcum</i> ssp. <i>monococcum</i>        | AA     | 1953                 | 84.3        | 84.2     | 78.0     |
|                  | HQ834309          | <i>T. monococcum</i> ssp. <i>monococcum</i>        | AA     | 1953                 | 83.9        | 83.9     | 77.8     |
|                  | EU984509          | <i>T. monococcum</i> ssp. <i>aegilopoides</i>      | AA     | 1899                 | 86.3        | 86.36    | 84.3     |
| 1By8             | JF736014          | <i>T. aestivum</i> ssp. <i>aestivum</i>            | AABBDD | 2166                 | 62.2        | 62.1     | 63.9     |
| 1By9             | X61026            | <i>T. aestivum</i> ssp. <i>aestivum</i>            | AABBDD | 2121                 | 64.3        | 64.1     | 67.0     |
| 1By18            | KF430649          | <i>T. aestivum</i> ssp. <i>aestivum</i>            | AABBDD | 2166                 | 62.2        | 62.1     | 63.9     |
| 1Dy10            | AB281268          | <i>T. aestivum</i> ssp. <i>aestivum</i>            | AABBDD | 1950                 | 60.7        | 60.9     | 73.1     |
| 1Dy12            | BK006459          | <i>T. aestivum</i> ssp. <i>aestivum</i>            | AABBDD | 1977                 | 70.7        | 70.7     | 66.9     |
| 1Ax1             | X61009            | <i>T. aestivum</i> ssp. <i>aestivum</i>            | AABBDD | 2496                 | 43.5        | 41.0     | 36.7     |

|       |          |                                            |        |      |      |       |      |
|-------|----------|--------------------------------------------|--------|------|------|-------|------|
| 1Ax1  | KC167176 | <i>T. turgidum</i> ssp. <i>dicoccoides</i> | AABB   | 2496 | 46.6 | 42.6  | 37.5 |
| 1Ax1  | JQ689002 | <i>T. turdidum</i> ssp. <i>durum</i>       | AABB   | 2481 | 44.7 | 39.3  | 37.2 |
| 1Bx7  | DQ119142 | <i>T. aestivum</i> ssp. <i>aestivum</i>    | AABBDD | 2388 | 36.4 | 36.4  | 38.8 |
| 1Bx17 | AB263219 | <i>T. aestivum</i> ssp. <i>aestivum</i>    | AABBDD | 2244 | 34.1 | 34.55 | 36.3 |
| 1Bx20 | AJ437000 | <i>T. turgidum</i> ssp. <i>durum</i>       | AABB   | 2391 | 38.6 | 39.6  | 36.8 |
| 1Dx2  | BK006460 | <i>T. aestivum</i> ssp. <i>aestivum</i>    | AABBDD | 2511 | 37.3 | 37.3  | 43.8 |
| 1Dx5  | KJ144185 | <i>T. aestivum</i> ssp. <i>aestivum</i>    | AABBDD | 2523 | 37.7 | 37.1  | 38.7 |

---
